# Supplementary material for: Discovery of Defense- and Neuropeptides in Social Ants by Genome-Mining
Source: PubMed Central journal article supplement (PMC3308954; doi:10.1371/journal.pone.0032559), 2012-03-20
Supplement: pone.0032559.s001.pdf [file pone.0032559.s001.pdf]

A

*Myrmecia pilosula* **PIL3a** MKLSCLLLTLAIIFFVLTIVHAPNVEAKALADPESDAVGFAD--AVGEADP  
*Myrmecia banksi* **PIL4** MKLSCLLLTLAIIFFVLTIVHAPNVKAKALADPESDAVGFAD--AVGEADP  
*Myrmecia banksi* **PIL3** MKLSCLLLTLAIIFFVLTIVHAPNVEAKALADPESDAVGFAD--AVGEADP  
*Myrmecia banksi* **PIL5** MKLSCLSLALAILLTLAIVHSPNMEVKALADPEADAFGEAN--AFGEADA  
*Camponotus floridanus* **PIL-like** MRLLCLSIALAILIYIMAIMHSSRVEARATTSPDLSSSSSSSESWETPPKPP

## pilosulin domain

*Myrmecia pilosula* **PIL3a** IDWKKVDWKVSKKTCKVMLKACKFLG-----  
*Myrmecia banksi* **PIL4** FDI TKLNIKKLT KATCKVISKGASMCKVLFDKKKQE-----  
*Myrmecia banksi* **PIL3** NAI IGLVSKGTCV LVKT VCKKVLKQG-----  
*Myrmecia banksi* **PIL5** FAEANADVKGMMKAIKEILD CVIEKGYDKLAAKLKKVVIQQLWE  
*Camponotus floridanus* **PIL-like** KPPTSADLDEDAALARPIVNAVSLIINFVFEGRRSFL-----

B

## abaecin

*Acromyrmex echinator* **ABA** MKFHLFIFTLLAVMTVFAYQSPVRKPPAGGWKPFPTFPQGOPYNPKIRFPH--  
*Atta cephalotes* **ABA** MKFHLFIFTLLAVMTVFAYQSPVRKPPGGWKPFPTFPQGOPYNPKIRFPH--  
*Myrmecia ruginodis* **ABA** MKFYLFIFTLLAAMAVLAYQPPVKPPPPGGWKPFPTFPQGOPYNPKIRFLH--  
*Harpegnathos saltator* **ABA** MKFHLFIFTLLAVMAALAEFVPPQQPPGGWKPFPTFPQGOPYNPKIGK---  
*Apis mellifera* **ABA** MKVVIFIFALLATICAAFAYVPLPNVPQPG-RRPFPTFPQGOPYNPKIKWPQGY  
*Camponotus floridanus* **ABA partial** VKFYLSIFVLLIA-MAVLACSPIRQ--SPGGWKPISSFPSEPEFNFLNF---
