# Supplementary material for: Discovery of Defense- and Neuropeptides in Social Ants by Genome-Mining
Source: PubMed Central journal article supplement (PMC3308954; doi:10.1371/journal.pone.0032559), 2012-03-20
Supplement: pone.0032559.s004.pdf [file pone.0032559.s004.pdf]

**A**

*Camponotus floridanus* NP 1 -----MLTFQFTHAITFLAAIFLI  
*Atta cephalotes* NP 1 -----  
*Harpegnathos saltator* NP 1 MLSVPIRDCNTWNIGDEKSSSYYSVTRPDISWAFDTSESSRSVALGCVQMLKQKVERARI  
*Locusta migratoria* NP 1 -----MKATAALVAATLLLLAVTLF

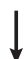**neuroparsin-A**

*Camponotus floridanus* NP 20 GKCYAHPTSR-RQEVVPALCVGCGTECDKCKFGFVISAICGIAECRRGPGDICGGPSEAW  
*Atta cephalotes* NP 1 -----GPGHICGGPSDSW  
*Harpegnathos saltator* NP 61 GKCYAHPMIWQRQDIRSKECTGCGNECDKCKYGVTVSALCGIEECRRGPGGEYCGGPSQSW  
*Locusta migratoria* NP 20 HRAERNPISR-----SCEGANCVVDLTRCEYG-DVTDFGRKVCAGKGPDKCGGPELH

*Camponotus floridanus* NP 79 GVCGDGLICSCNRCAGCSLDSLVCFANHACLPHQSLES GSHLDLDFERFPSQFDRVAK---  
*Atta cephalotes* NP 14 GVCGDGLICSCNRCAGCSVDNLTCTF-----  
*Harpegnathos saltator* NP 121 GVCGEGMFCICDRCVGCSDFLTCT-KSCLPHQSLEQRGHEINDGVFINRYMENRPPD  
*Locusta migratoria* NP 73 GKCGVGMDCRCGLCSGCSLHNLQCFEFEGGLPSSC-----

*Camponotus floridanus* NP -----  
*Atta cephalotes* NP -----  
*Harpegnathos saltator* NP 180 GRLIEGRQMDERRLRGLNMKRK  
*Locusta migratoria* NP -----

**B**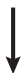**eclosion hormone**

*Acromyrmex echinator* EH 1 -----MPSLSNRI MVLLIMVFAILCFTVSTNAERN-----IGVCIRNCAQCRKMFG  
*Atta cephalotes* EH-like 1 -----IGVCIRNCAQCRKMFG  
*Drosophila melanogaster* EH 1 MNCKPLIILCTFVAVAMCLVHFGNALPAISHYTHKRFD SMGGIDFVQVCLNNCVQCKTMLG

*Acromyrmex echinator* EH 47 VYFMGQKCADFCMKYKGLIPDCEDEYSIRPFLQVAEYDY  
*Atta cephalotes* EH-like 17 VYFMGQKCADFCMKYKGLIPDCEDEYSIRPFLQVAEYDY  
*Drosophila melanogaster* EH 61 DYFQQTICALSKFKGKAIPDCEDIASIA PFLNALE---
