# Supplementary material for: Discovery of Defense- and Neuropeptides in Social Ants by Genome-Mining
Source: PubMed Central journal article supplement (PMC3308954; doi:10.1371/journal.pone.0032559), 2012-03-20
Supplement: pone.0032559.s009.pdf [file pone.0032559.s009.pdf]

**Novel peptides (DNA and precursor protein sequences): putative CDS**

| <b>Sequence ID</b>             | <b>GenBank accession</b> |
|--------------------------------|--------------------------|
| >Cf_pilosulin-like             | AEAB00001185.1           |
| >Cf_defensin-1                 | AEAB01018225.1           |
| >Cf_defensin-2                 | AEAB01026853.1           |
| >Ac_defensin                   | ADTU01021145.1           |
| >Hs_defensin-1                 | AEAC01007503.1           |
| >Hs_defensin-1a                | AEAC01007503.1           |
| >Hs_defensin-2                 | AEAC01015843.1           |
| >Cf_diuretic-hormone-like      | AEAB01029697.1           |
| >Ac_diuretic-hormone-like      | ADTU01016305.1           |
| >Hs_diuretic-hormone-like      | AEAC01024560.1           |
| >Cf_abaecin-like               | AEAB01017814.1           |
| >Ac_abaecin-like               | ADTU01009315.1           |
| >Hs_abaecin-like               | AEAC01003437.1           |
| >Ac_eclosion-hormone-like      | ADTU01024031.1           |
| >Ac_neuroparsin-like           | ADTU01005355.1           |
| >Cf_allatostatin               | AEAB01013854.1           |
| >Hs_allatostatin               | AEAC01017332.1           |
| >Ac_allatostatin               | ADTU01011027.1           |
| >Hs_inotocin                   | AEAC01019310.1           |
| >Cf_inotocin                   | AEAB01028364.1           |
| >Ac_inotocin                   | ADTU01000445.1           |
| >Cf_ion-transport-peptide-like | AEAB01021789.1           |
| >Ac_ion-transport-peptide-like | ADTU01018997.1           |
| >Hs_ion-transport-peptide      | AEAC01008001.1           |
| >Cf_CHH-like                   | AEAB01021790.1           |
| >Ac_tachykinin-related-peptide | ADTU01000331.1           |

### Pilosulin-like

```
>Cf_pilosulin-like [organism= Camponotus floridanus] putative precursor
protein (partial)
MRLLLCLSLALAIYIMAIMHSSRVEARATTSPDLSSSSSSSESWEIIPKPPKPPTSADLDEDAALARPIVNAVSLI
INFVFEGRSFL*
>Cf_pilosulin-like [organism= Camponotus floridanus] (partial)
ATGCGATTATTGTGTTTGTTCATTAGCGCTCGCTATAATCTATATTATGGCAATCATGCACTCTTCTAGAGTGGAA
GCGAGAGCAACCACTTCTCCTGATTTATCTTCTTCTTCTTCTCCGAAAGTTGGGAAAATACCTCCAAAACCTCCA
AAACCACCTACTTCTGCGGATCTCGACGAAGATGCTGCTTTAGCCAGACCAATTGTTAATGCCGTAAGCTTAATT
ATAAATTTCTGATTTCGAGGGGAGGAGGAGTTTCTATAA
```

### Defensins

```
>Cf_defensin-1 [organism= Camponotus floridanus] putative precursor protein
(complete)
MKLLVIFATFAVLAYVSANTLSAVYDGPYELTTIDEPQYDEMASNLSPIRHRRTCDLLSWQSQWLTINHSACA
AKCLVQRRRGRCRDGICVCRN*
>Cf_defensin-1 [organism= Camponotus floridanus]
ATGAAGCTGCTCGTTATCTTCGCCACTTTTGCTGTACTAGCTTACGTTTCGGCAAACACACTATCGGCTGTTTAT
GACGGACCTACTTACGAATTGAGTAAGTACGTTTTATCGTAAAAGAGAGGACGACGGAAAAATTTCTCGTAGCTC
AAATGAAAAGTCTCTCGATAATTGAACAATTTTATTAAGCTTTAATTAATTTCAAATAATCTCTCTGCTTTTTT
TATCGGAGATTTTTTTCGGGAGATATCAAGAAAGATATTTGAAAGACAGAGAGATATTGTTAAGTATTAATAATC
TAAATATTATTTTTGTATTATGAAGAAATTATGATGCAAATATTAGTGTGTTGTTGTTATAGCCTTATTTTTTC
GAGGAGAGTAATATTGCATTGTACAATATAGGGAAACTTTTCAACTTTGATTAATAAATATCTAGAATGCATTAT
CTTTTGTCAATAATAATGTGTTATACACATAAATACATATATTCTCTGTCTCGCTCTTTCTCCTTCTCTCTCTAA
TCTTTTCTTTCTCCAATGTACCCTTTTAGCATACATTGATAATACATTGTTCGATATCCTTTCAATATGACACGAC
CTTTCTCTCTGATGAATCATTGACTTATCGCATCATTCCGAATGCTAAATTAGAAAATAGTATTTACTTTACTC
TCTGAAATATCATTTAAATATTAATAATCAATATTTTAAATTAATAATATTATTAATAATTTTAAATAT
TAAAATCAATCTTCCGTAATTAAGTCTCAAATAAATAAATTAATTTCTTTTAAAACTCGAAATTTATTTAATAA
AAATAACTCCCAATATAAGGTAATTCGTAAGAAAGAAAGAAAGTGTCTTTCAAATTTCTTCAATTTCTCACCTTACTT
TAAACGAAAAGACAGCGCAAAGGAAGAATTAACCTTATCTCGTGAGAGAATGTGCATTCCTGTACAAAAT
CTCTTTTTCGTTTCGTCGCCGTAATACGATTTTCGCATTGTAACATACATGTTGTCGAATATATATCCTGTGTTTCGTG
TAAAATTTCAATATACTCTGTGAAACGCGGAATTTTCGGTCTTATTATCGCACGAGGGAAAATAATGGGAAAATTG
CTCGAATTGTTTCAGCCACCATCGACGAGCCGCAATACGACGAGATGGCATCGAATCTGTGCGCCCATCCGACACC
GGCGCGTAACCTGCGACCTTTTATCGTGGCAATCCCAATGGTTGACCATAAACCACAGTGCCTGCGCGGCTAAAT
GCCTGGTGCAGCGTCTGTCGGGGCGCCGCTGCCGCGACGGCATCTGCGTCTGCAGGAATTAG
//
Gene 1
Gene 25203 26536
  Exon 25203 25299 phase 0
  Exon 26343 26533 phase 1
//
FT          CDS      join(25203..25299,26343..26536)
FT          /note="Match to DEF2_APIME_Defensin-2"
//
>CamFlo_2676.[25203:26536].sp.tr
MKLLVIFATFAVLAYVSANTLSAVYDGPYELTTIDEPQYDEMASNLSPIRHRRTCDLL
SWQSQWLTINHSACAAKCLVQRRRGRCRDGICVCRN
//
>CamFlo_2676.[25203:26536].sp
ATGAAGCTGCTCGTTATCTTCGCCACTTTTGCTGTACTAGCTTACGTTTCGGCAAACACA
CTATCGGCTGTTTATGACGGACCTACTTACGAATTGACCACCATCGACGAGCCGCAATAC
GACGAGATGGCATCGAATCTGTGCCCCATCCGACACCGGCGGTAACCTGCGACCTTTTA
TCGTGGCAATCCAATGGTTGACCATAAACCACAGTGCCTGCGCGGCTAAATGCCTGGTG
CAGCGTCTGCGGGGCGCCGCTGCCGCGACGGCATCTGCGTCTGCAGGAAT
//
```

```
>Cf_defensin-2 [organism= Camponotus floridanus] putative precursor protein
(complete)
MKIYVFTLLVVTIAIAVAFPTEELELEENVTVESPDFLILKDKSLQETPIKEHNRTRRATCDLLSGFGVNHSACA
AHCILRKGKTGGRCNSNAVCVCRA*
>Cf_defensin-2 [organism= Camponotus floridanus]
ATGAAGATCTACGTATTTACTCTTTTGGTGGTGACGGCAATCGCCGTTGCATTCCCTACTGAAGAGCTAGAGCTA
GAGGAAAATGTAACGGTAGAGTCTCCGGACTTTTTGATACTGAAAAAGATAAATCTTTGCAAGAGACACCTATC
```

```
AAAGAACATAATCGTACCCGTAGAGCTACCTGTGATCTTTTATCTGGCTTCGGTGTTAATCATAGCGCTTGCGCA
GCTCACTGCATTCTAAGGGGAAAAACCGGGGAAGATGTAACAGTAACGCTGTTTTCGGTGTGTCGCGCGTAA
//
Gene 1
Gene 652 1344
  Exon 652 715 phase 0
  Exon 1115 1344 phase 1
//
FT          CDS      join(652..715,1115..1344)
FT          /note="Match to DEF_FORAQ_Defensin"
//
> CamFlo_1.0_4.contig2890,.[652:1344].sp.tr
MKIYVFTLLVVTIAIAVAFPTTEELELEENVTVESPDFLILKKDKSLQETPIKEHNRTRRAT
CDLLSGFGVNHSACAHAHCILRGKTGGRCNSNAVCVCRA
//
> CamFlo_1.0_4.contig2890,.[652:1344].sp
ATGAAGATCTACGTATTCACCTCTTTGGTGGTGACGGCAATCGCCGTTGCATTCCCTACT
GAAGAGCTAGAGCTAGAGGAAAATGTAACGGTAGAGTCTCCGGACTTTTGGATACTGAAA
AAAGATAAATCTTTGCAAGAGACACCTATCAAAGAACATAATCGTACCCGTAGAGCTACC
TGTGATCTTTTATCTGGCTTCGGTGTTAATCATAGCGCTTGCGCAGCTCACTGCATTCTA
AGGGGAAAAACCGGGGAAGATGTAACAGTAACGCTGTTTTCGGTGTGTCGCGCGTAA
//
```

```
>Ac_defensin [organism= Atta cephalotes] putative precursor protein
(complete)
MKLFAILVIFVVLACTSVSTLPAVYDGPYELTTIEDPVNDEMPSDLSPIRNRVTCDLLSWQSKWLSINHSACA
ARCLSQRKGGRCRDGICVCRN*
```

```
>Ac_defensin [organism= Atta cephalotes] putative
ATGAAGCTGTTTCGCTATCCTCGTTATCTTCGTCGTATTGGCTTGACCTCAGTCAGCACACTACCGGCTGTCTAT
GACGGACCTACTTATGAACTGAGTAAGCATAACATTTCACTGAGAAAAGACTGAGAAAATAATTCATAAAATAAATTT
ATGAGTTATCTTAATCTTCCGGTGTGCTGACGCGAGCAGCATCTGCTCTAGTAATACAGTACTGATGCTGGGTTTGT
AATATTCTTCTACATCGATAACTGTGTCAGTACCAACAAATATTGATAATATTATTGATTGTGTGCGGTTAATAT
TGATGGATTGAATATGGATTTCTTGATTTTTGAGCATCAGAACAAATTTGAGCACAGGATACTGTTGCTTGAGAAAT
CATCGTTAATAATACTGTCAATATTTATGGGTATTAACAGATTTTTGATTGTATAAAATTCGTAAAATTTGAGTTA
AAATATTATTATCAATAATGACAGAAAAGAACAATTTGTTGATCAAGTATCTAAAAATTTAGTTAGATTACAGATC
TGAAGATAAATTTTGTGTGACCATCAAAATAATTATATACATGTTCAAACCTGTTGTTAGAATGTCAAACCTTTTTC
CAGCATTACTCGTCTTGACATTTTTATATAATTTTATTTAATGATCCAACAAAATTTATTTTAAACCTGTATCTA
GCTAAATTTTTAGACTTCAGTAAAACCATTTTTTTCGTATATTAATCATGTTAAATTTAAAAATATTGATGTAT
ACTATCAGTATTACTGATTCAATATTAATACTAATCGATGTTATTAATCGTAAAACAGAAAGATTCACTTAATTTAGACT
AATCAAAAAGCATAATTAATTTTCAGAAAATCAAAAATAACATAAATCATATTTAAAAAAGAAATCAATATTAGGCA
TATTTTAATGAGAATAATCCGAATTTGTAGATGTAATATAAAGAAAATTTAAAAAATATAATGACTAACGGGCAAT
TGAGAACAATAATCACGCAATTAATTCATGCGTAATAATTAATAAATGTATTGTTCAAGACGTTATATACAAAAGTA
ATTATGTTTATGGCGGAATCGTCATTTCAACAATTTATTTGGTGCAGAACAGTACTCTGAACAAATTTTGCCTAT
CCATTCTTTATAAATAACTTATTGTACTTTTTCAATATTGATCATAATTAGCAGCTGTGCTCACTCGGCTTATTG
ACATGAATGTTTCTCAAACCTCCTCAACTGCTCTTTTATATTTATTTTATCCGATTGATTAATTTTGAATCTA
CCATAGGACATTGCTGATGATGACTCGAATGGAGCCGAAATGTTTCGATTCTTCTTATTTATATGTAACGCTTAGA
ACAATACATTTTATTAATTATTACGCACGAATAATTGCATTGATTATTGCTTTCAATTCCTGTTAATCATTACAT
TTTTTATCTCAAAAGCTCAATTTATTTTACTTTTTATATTATTATATATTAATTTTATAATAAAAGAAAATTTGTTG
TCATTTTTGACAGAGAGATTTTAATTGAGAACCAGCAATATATACATATATCAGTTTCGAAAATTTAGATTTAAAT
AATAGTCAAGTTCCTTTAGTAATGGAGCGACTCTTAACAAGTTGTAATTAATCTTAGATTAATCTATATATAATTT
CTTACTTTATCAGAGATTTATTTCACTGAGATATCAAGTTTGAGTTACATTAAGTAACTTTTTTGTGCGATAATTA
GATCGGATATTATAATAAATGTTTGGCTCGTTGAATATTTATACCGTAATTTTATTTTACGGAAAACGGGCGCTC
GCCGAGATAACAACGTGACGATACTTTGCAATAGAGTAATAAATATCTAGAATGCTCAGTCTTTTGTCTCGCGCTG
CATAATAGTTGCACATATATTCTTCTCTTCTCGCTTTCTCTCCTCTCGCTGACACTCTTTTGGCGTTCTCTGTA
TAATACGCTGTGATATCCTTTTATATCGAGCTCGACACGACCTTTTCTACTGATGAATTCATTATTTAGAGTT
ACTATATCATTTCGAATGCTGAATTAGAAATAATCTTTCGCGCTTAGTTGCGTACTAAATAAGCTGTTTCCATAA
AGGCCCTGCTAAATATTTTTTAAATATCAATTCAAATGTCAAAGTGATTTGCATAAATTAGAGTTACATAAAAAAGG
TTGAAGTTTGAATTTAATTCGCAAGAGTCATAACAATTCATTATAAAAATTTGAAAAACAGAGAGAAAAGGGAGA
CGAAGTTGTTTTAAATTTCTTCGAAAACCTTTTACTTATCTCGCTTTATGTATCAAGAACAATAAAAGAAAAGGAG
TTAACTTCATCTTCATAAGAGAATATACATATCTATACGTATCCTTGATAAAACCTCTTCTACGCGAGTCTAACGA
AAGCTCTCAAGACACCGGATACTTTTAAAGGGTACATAAAAACCGGATACTCCGCAATAATTGATGTTCTCTACCT
TTATCGGAAAATAAAGCGGAGGAATTGCATTTTCAGCTACCATCGAGGATCCAGTGAACGATGAGATGCCGTGCGGA
TCTGTGCGCCATCCGAAACCGGGCGCTGACCTGCGACCTTCTGTCTGCGAGTCCAAGTGGTTAAGTATCAATCA
```

```
CAGTGCCTGCGCAGCTAGATGCCTGTCGCAACGACGCAAAGGTGGCCGCTGCCGCGACGGTATCTGCGTCTGCAG
AAATTAG
//
Gene 1
Gene 339 3042
  Exon 339 435 phase 0
  Exon 2849 3042 phase 1
//
FT          CDS      join(339..435,2849..3042)
FT          /note="Match to DEF2_APIME_Defensin-2"
//
>Atta_cephalotes_contig21145.[339:3042].sp.tr
LFAILVIFVVLACTSVSTLPAVYDGPYELTTIEDPVNDEMPDLSPIRNRRVTCDLLSW
QSKWLSINHSACAARCLSQRRKGGRCRDGICVCRN
//
>Atta_cephalotes_contig21145.[339:3042].sp
ATGAAGCTGTTTCGCTATCCTCGTTATCTTCGTCGTATTGGCTGTACCTCAGTCAGCACA
CTACCGGCTGTCTATGACGGACCTACTTATGAACTGACTACCATCGAGGATCCAGTGAAC
GATGAGATGCCGTCGGATCTGTCGCCCATCCGAAACCGGCGCGTGACCTGCGACCTTCTG
TCTGGCAGTCCAAGTGTAAAGTATCAATCACAGTGCCTGCGCAGCTAGATGCCTGTGCG
CAACGACGCAAAGGTGGCCGCTGCCGCGACGGTATCTGCGTCTGCAGAAAT
//
```

>Hs\_defensin-1 [organism= Harpegnathos saltator] putative precursor protein (complete)

MKLLAIFALFCVLAYASASALPAVYDGPYIELTPIEEAASDNTPRDMAEEVPIRQRRVTCDLLSWTSKWFVFNNS  
ACAAKCLVQRRRGGSCSGGVVCRG\*

>Hs\_defensin-1 [organism= Harpegnathos saltator]

```
ATGAAGCTGCTCGCTATCTTCGCCCTCTTCTGCGTGTGGCGTACGCCCTCGGCGAGCGGTTGCCTGCCGCTCTAC
GATGGACCGATTTATGAGCTGAGTAAGCATATTTTTGTGCGATTCCGAATTCACCGCGCGATGCGTCCGCTTCTTA
CACGTCCGCGACGATCGGTCATCGAGCTTTTCGCCCGGGCCGGCATTAGAGTCCGATTTTGCACCTGAGAACTGA
GAGTCTTGAGCTCCGCTTGAGGTGGCACGAAGCTCGCCTGATCGACCCGTCGCGCAAATAGTCGTCGCTTGAAAC
TGCTCTCCGATGAGACACTCTGGTCCGAATGTAGAGTCCGATCTGGGTGAATGTTTCGATTGGATCATAACGATAC
ACGCGACGTTGTGCTTGTAAATCGCGATTCAACTGCCAGAGTACATCTTGAGATTCCAATCCGACTGTCTGAATC
TCGAGGCAAGTTTCGAGTAACGACTTAGTTGACACGCGAGAGAGCCTCGGCGTCTCGAGAACGGACCGGGGGAAG
TCCCGGCTATCAGATCGGACGGCGAGAATGTGCGCGTCCAGGTTCCCTCGCGAAAATTCGCCGTTAGGCGACTA
CGTGCATACGTCCTCCGATACTCTTCATCTCGACACGTCACCTTCGGGATACAGCGCCGGGGAAGTCTCGATGGAG
TAATAAATATCCAGAGTACACGCTACAGAATAGCCCCGTCACCTCCGATTCTACTCCACGCTTCTGGCATGCTCCG
ATAATACGCTGTGCGATATCCCCTCACGTCGTAGTCCGACGCGTCTTCTGCTCCGTCGAGAACTATTTTCGTTATT
ATTACAGCGAGTTACGCGTCGAGTCGATCGCAGCTTCCCCCGTCGACGCGCGTGAATCCTCCGCGGTGAGAAAGG
AAAAAATTGTATCGGTATTTGCCGACTATAATTGCCCGCGAGTGAAATATTAGGCGTACAGCTTAATTTCTCGGC
CCCAAATTCGAATGACAGCTTCTATTCAAATTTGACATTTATTCCCGCCCTATGGTGGTCTGAGAGTACTAA
GTCACAGCTTTGCAATATGCAGTATAACAGATGGCAGCCCTGTTGATAAAGGGTGTCCAAAATTCACGCAAGAA
GTAATTTTGTAGATAAACAACAGGTTTATAAATTAATAAATTTGTAATTTTATTGATTATAAAGTATAGGGTTAT
GTATGGAATAGCATACGGGTAATGGCCTCCACGGCTTTGCTGGCACATATGCGCTCTTTGTTGAAATTTTCC
ATGACCGTTTTGCATAAATGTGGCTAAATTTTCGTTGATACAGCGCTCAATTTCTTCTCAAGGCGTGGGTGTCG
TGGGTTTTGTTGGTATAAATCTTAGACTTCAAAGAAGAAACCCCAAAGAAAAAGTACAACGGCGTTAAATTCGCA
TGATCTGATACCCAAAACGGGAAATTAACAGACCAGAAAATGACTCATGCAGTAATTGAATGTTTCTCGGGCTG
TATGGCATGTGGCACCGTCGTCTTGTGAAAGCACATGTCGTCCACATCCATATCTTGCAATTTAGGCACAAAAA
ACTGGATTATCATGTGCGATAGCGAGCACCATTAAATAGTTATTGCTGACCAACCGCATTTTTCGAAGAAGAAAT
GGTCCGATGATGCCCCAGCCGCAAAAATCCGCACCAAAACAGTGACACGCTGTGGATGCATTTGATCTTCTGAAC
CCCAAATGCGACAATTTTGTGCGATTAACCAAGCCATCGAGATGAAAATGAGCCTCATCGCTGAAGATGATTTTGT
TCGTAATAATCAGCACTTGTGTTGTTCCATAATCCATTCAACGAACCTCTTTCGCTGTGCGTGGTTCAGTTTAAAA
ACCCTGAACCCTGTGAGCTGTGACGCTGTCTTTTTTATTTCGTTGGCAACACTTTGCCCGCAAAAATGGCGCAAAAAT
TCAAATCTTTCGCTGAATTTTGGGACACCTTTTGTAACTCAAAGACAGTAGTGAATGCAATGTCGTTTCGAAAAGC
AACATTTGAGGCACTGCCTCCTTTTTCGCTTTTCAAACCTTAAAAAAAATGCAGCTGAAGCGCAGGAAAGTATTTGTT
GTTCCGGCTTTGGGCGAAAATGCTGTTTTTCCACAGCACTTGCAAGAAGTGGTTTTTCAGAGGTTTTCGAGAAGGAAAT
CCGGTCTTGAAGACGAACAACGACTGGATCAGCCAAGGAAGGATGTTGCGTACTACGAATTTGCTTGAACCCGGTC
AAACGCTCAATGCTGAACGCTACAAGCAACAATAATCAAAGTGAATGACGCACTCGAGCAAAAAAGACCATTTA
CTGGTAGCGGAACGAGGCAAGTATCACTGCTGCATTATAACGCACGGCCACACACGGCAAAAAGCGACCTTGAAAA
TCATCTCCGACTCAGACTGGAATAATCCTTCCACGCGACGAATCTTTCAGACCTCGCCTCATCAGAGATCATCA
CCTGTTCCGATCGTACATCACCTAGCTGATTTCGCATCTCCGAACCTTCTGAAGAAGTTCAGAAAAGCAGCA
TGACTTCATTGAGTCAAACACCGTCGTTTTTCAAAGCGGAATTCGAAAAGTTGCTTGGAAAGTTGCAGAAAATG
TGTAGAAAAGTGAGGGAGATTACTTTTCAGGATTAGGTCCTTTTATTATCCTTTTCTTTTGAAACTGAGCATTGAAGTT
GAGCAAAAAGGCCGAGAATTAAGTTGTACACCTAATAATTGCACTCGCCGATCATTTCTTTTCGTAGCGCGGCTA
```

```
CGAAAGTCGGTGCTGCGTGAGAAAAATAGTGTTACCGATGATAAGTTTATTGTGCCGCTGCTATATTTCTCTCGCT
GGAATTGGAGCGATCGGAAGAGATACGACTGACGGCAGAAATAACTGAAATGTGTAGCGAGATCGGTGATTCTTT
CTTTCTCACAACGTACGAACGCTTCGCTGTCCAGCGGAATATCCGCGTGACGTAAGAATCTCGCGGTGCGGCACG
TCGCGAGACTCGCCCCGCGAAAAATTTCCCGGCTAAATTTTCCGTGCCTTCTTCCGACGGTAAACCGATGAGAC
ATCTTCTACGAATTCACGAATATTGGCGAAACGTTGGCGAAGGATCGTACTTGTCTCGTAAATGTTCTCGGCTG
AGATCCCACGTGAAAGCCAAAGCAACAAACAACCTACGTAGTCGCGCTCGGGTCCGAGTCCGAGTGGCTTTCCAA
CTCGCGCAGAATAAATTCTCCGCGCTGAATCGTCGGGTGAATATCTCCCTTGGAACTGGAGGCCGGAATCTGAC
TGACATGTGCTCCCCGATCATCGGAATGAATCCGCTCTGATTGCGCGATTGAAACATTCATTTGTTTCATGACTTT
AAAAACCTCGTCGATTTGAGTGGAAACACACGCACTCTGCCGATTTCAAGTGACAGCGTCCGAGTGATCTTCAGCAT
CGAGCTTCGAGCGAATTTTCATTTCGTTCCCGGTGAGAATCACTCCACTTGAAGAATTCGAAGGGGAATCGATTT
TAACGCAACGCGTCCTTGCCCCGATTATTCCGTCTATCCGACCCTCTAATTCCAGCGAGATATTTACCTGAGGA
GACTCAGAGAGGAGGCAACAAGACAACGTCATTTCGTATCGTGTTCGGAAGCCTAGACAAGAGAGACCTTCTTGCG
CCTCGTCTTGTGTCCGTGCAAGAAGCACAGGTCCAACGAGCCGTGTTAAGGGTTCCAAAACCTCGGTTTCGAAAAATC
GAACCGAACTACTGTGATGAAAAAGTATCCGAAGTTTATTTTTAAAAATCAAAATTACAGTTCAATCATTCATGA
ACATTCTTATAGTTTCTTCAAAGTAGTCCCCATTGCTTGCAACGCACATATGCCAGCGTTTGATCCAATCCTGG
AAACATCGCTCATACTCGCGCGGACGCGGTATGGCCTTCAATTCACGACGATTTTCTCTCATGTCTCTCAA
TCGATTCGAAACCCGCTGTCCCGGAAGTGGTTTTTTCAGTAGGGGGAACAGGAAAAAGTCGACGGGGGCCATGTC
TGGTGAATACGGTGCTTGCAGCAGCAGATTCGGTGGGTTTTTTGTGTCAGAAATTCACGCACAAATGTCGAGTGGT
ATGCGATCAGGTGCAAAAGTTGTGCGGATGCAAAATCCACGAGTTGTTTTCCACAATTCAGTCGTTTCTTATG
GATTTTTTGTGTCGACGATCCAAATGATACTCCAACCTTCATCTGCTATCTCTCGCACAGTCAATCGACAATTTTG
GAGCACCGATTCTTTCATTTCTCAATGTGAGCTTCATGCGTGACGTTGATGGTCTTCCAGAGCGTGCTGCGTGG
GTCGTCTTCAACGGATTCTCGTCTTCTTGAACCTTCTTAAACCACTCAAACGTAATTTGTTTTCGATAAAACAATC
ATCGCGCCATAAGCTTTCTCATGCAACATTTTCAACGCGTTTGTGAACGAAATTCGCGTGGCAACACAAAAATTC
AAACAAATTTCTTGTCCATATTTTCCGACATCACAATAATCGCCGTGCACAACAATCTTCACTGACACAAAACA
CTCCCCTTTCAACTGCGGCTTGAAGGAACGCCATGATTTTTTACCACAAATGTGAAGGACATGCGTACCAATTTG
AGAAAGCAAACGGATTTGAGTCACAGTTTACCCGCGATTTTTTAAAAAATAAAGTTTCGCATACTTCTGATCACCT
GATAAGTAAACTTCGTTACGCGCAAACGCCTCGCTTCGGACTGATGAATGAAAAAGAGATCGCGTTTTGCTTCAG
CCCCATTGAGGAAGCGGCGTCCGACAACACGCCACGGGACATGGCAGAGGAAGTGCCCATCCGACAGCGTCCGG
TCACCTGCGACCTCCTCTCTTGGACGAGCAAGTGGTTTCAGCTTCAACAACAGTGCCTGCGCGGCAAAAGTGCTTAG
TGCAACGTCGTGCGGGCGGTTCTTGCAGTGGCGGTGTCTGCGTCTGCAGGGGTAA
```

```
//
Gene 1
Gene 1252 6253
  Exon 1252 1348 phase 0
  Exon 6051 6253 phase 1
//
FT          CDS      join(1252..1348,6051..6253)
FT          /note="Match to DEF2_APIME_Defensin-2"
//
>HarSal_7503.[1252:6253].sp.tr
MKLLAIFALFVCLAYASALPAVYDGPYIELTPIEEAASDNTPRDMAEEVPIRQRRVTC
DLLSWTSKWFNNSACAACLVQRRRGSCSGGVCVCRG
//
>HarSal_7503.[1252:6253].sp
ATGAAGCTGCTCGCTATCTTCGCCCTCTTCTGCGTGTGGCGTACGCCTCGGCGAGCGCG
TTGCCTGCCGTCTACGATGGACCGATTTATGAGCTGACCCCATGAGGAAGCGGCGTCC
GACAACACGCCACGGGACATGGCAGAGGAAGTGCATCCGACAGCGTCCGGTTCACCTGC
GACCTCCTCTCTTGGACGAGCAAGTGGTTCAGCTTCAACAACAGTGCCTGCGCGGCAAAG
TGCTTAGTGAACGTCGTGCGGGCGGTTCTTGCAGTGGCGGTGTCTGCGTCTGCAGGGGT
//
```

```
>Hs_defensin-1a [organism= Harpegnathos saltator] putative precursor
protein (complete)
MKKRSRFASAPIEEAASDNTPRDMAEEVPIRQRRVTCDLLSWTSKWFNNSACAACLVQRRRGSCSGGVCVCRG*
```

```
>Hs_defensin-1a [organism= Harpegnathos saltator]
ATGAAAAAGAGATCGCGTTTTGCTTCAGCCCCATTGAGGAAGCGGCGTCCGACAACACGCCACGGGACATGGCA
GAGGAAGTGCATCCGACAGCGTCCGGTTCACCTGCGACCTCCTCTCTTGGACGAGCAAGTGGTTCAGCTTCAAC
AACAGTGCCTGCGCGGCAAAGTGCTTAGTGAACGTCGTGCGGGCGGTTCTTGCAGTGGCGGTGTCTGCGTCTGC
AGGGGTAA
```

```
>Hs_defensin-2 [organism= Harpegnathos saltator] putative precursor protein
(partial)
SLSNYLFAGDNTRKSSKLLLDNRVHLRARGATCDVLGAFKHWTTPLASRRCIARERSGGSRNSQYVCVCK*
```

>Hs\_defensin-2 [organism= Harpegnathos saltator] (partial)  
TCTCTGTCTAACTATTTGTTTGCAGGTGACAACACACGGAAGTCATCTAAGTTACTTCTCGACAGAAACGTTTCAT  
CTCCGTGCACGTGGGGCCACTTGCACGTCCTCGGTGCTTTTTAAGCACTGGACCACTCCGCTTTCGCTCGCGGCGC  
TGCATAGCTCGAGAAAGGTCCGGAGGCAGCCGCAACAGCCAATATGTCTGCGTGTGCTGCAAGTGA

### Diuretic hormone-like

>Cf\_diuretic-hormone-like [organism= Camponotus floridanus] putative precursor protein (partial)  
CIIPSLLLYVIFAIVNRSIQFCARSHEYSYWDQDDIDRDEFLELLSRLSRTVMNRPPEMENSKRGLDLGLSRGFS  
GSQAAKHLMGLAAANYAGGPGRRRRSEQA\*

>Cf\_diuretic-hormone-like [organism= Camponotus floridanus] (partial)  
TGTATAATACCAAGCCTGTTGCTATATGTCATTTTTCGCAATCAAAGTTAACCGATCGATCCAATTTTTGCGCACGC  
AGCCATGAAAGTTACTGGGATCAACAGGATGACATAGACCGAGACGAGTTTTTAGAGCTACTTTCTCGTCTAAGT  
CGCACCGTTATGAACCGTCCCGAAATGGAAAACAGCAAACGAGGATTGGATCTGGGTCTCAGTCGTGGCTTCAGC  
GGTTCTCAAGCGGCGAAACATTTGATGGGACTCGCGGCGGCGAATTATGCCGGCGGTCCCGACGGAGGCGTTCGC  
TCGGAACAGGCGTAA

>Ac\_diuretic-hormone-like [organism= Atta cephalotes] putative precursor protein (partial)  
RSTKRGLDLGLNRGYSQSAAKHMMGLAAANYAGGPGRRRRSEQAVIRCLLLCAVFTINRSIPQSILLHYARSHE  
SYWDQDDIDRDEFLEILSRLSRFNRPEME

>Ac\_diuretic-hormone-like [organism= Atta cephalotes] (partial)  
CGCTTGTTCGAGCGACGCCTTCGTCCGGGACCGCCGGCGTAATTCGCTGCCGCGAGTCCCATCATGTGTTTTCGC  
CGCCTGAGAACCCTGTAGCCACGATTGAGACCCAGATCCAATCCTCGTTTTGGTACTGCGAACTTCCATCTCAGG  
ACGGTTGAAGCGACTAAGACGAGAGAGTATCTCTAGAAACTCGTCTCGGTCTATGTCATCTTGCTGATCCCAATA  
ACTTTCATGGCTGCGTGCCTAGTGTAAAAGAATTGATTGAGGAATTGATCGATTAATCGTGAAAACCTGCACACAA  
TAATAAACATCGAATTAC

>Hs\_diuretic-hormone-like [organism= Harpegnathos saltator] putative precursor protein (partial)  
NRTFSRSTKRGLDLGLSRGFSQSAKHMGLAAANYAGGPGRRRRSEQAHEYSYWDQDDIDRDEFLEILSRLSR  
TVMSHPPEMEK

>Hs\_diuretic-hormone-like [organism= Harpegnathos saltator] (partial)  
CGCCTGTTCCGAGCGACGCCTCCGTCCGGGACCGCCGGCGTAGTTTCGCTGCTGCGAGCCCCATCATGTGTTTTCGC  
CGATTGAGAACCCTGAAGCCGCGACTTAGACCCAAATCCAATCCTCGCTTGGTGTGCGAGAAAACGTGCGGTT  
TACTTTTCCATTTTCAGGATGGCTCATTACGGTGCAGACTGAGACGAGAGATATCTCTAGAAACTCGTCCCGGTCT  
ATGTCGTCTTGCTGATCCAGTAACCTTTCATG

### Abaecin-like

>Cf\_abaecin-like [organism= Camponotus floridanus] putative precursor protein (partial)

VKFYLSIFVLLIAMAVLACSPIRQSPGGWKPISSFPSHEPFNLLNF

>Cf\_abaecin-like [organism= Camponotus floridanus] (partial)

GTGAAATTTTATTTGTCTATTTTTGTGCTCTTGATAGCAATGGCGGTTCTTGCGTGCTCTCCAATCAGACAATCT  
CCAGGTGGTTGGAACCAATTTTCGTCTTTCCCCAGTCACGAACCGTTTAACTTCTTATTAATTTTC

>Ac\_abaecin-like [organism= Atta cephalotes] putative precursor protein (complete)

MKFHLFIPTLLLVAVMTVFAYQSPVRKPPPGGWKPFPTFPGQGPYNPKIRFPH\*

>Ac\_abaecin-like [organism= Atta cephalotes]

ATGAAATTTTCACTTGTATTTACTTCTGCTCTTGGCAGTAATGACAGTCTTTGCGTATCAATCTCCGGTCAGA  
AAACCGCTCCAGGTGGATGGAAGCCTTTCCCGACTTTTCTGGTCAAGGACCATATAATCCGAAGATCAGATTT  
CCTCATTGA

>Hs\_abaecin-like [organism= Harpegnathos saltator] putative precursor protein (complete)

```
MKFHLFIFTLTLLAVMAALAFRVPPQQPPPGGWKKFPTFPGQGFNPKIGK*
>Hs_abaecin-like [organism= Harpegnathos saltator]
ATGAAATTCCTACTTGTTCATCTTTACTCTGCTCTTGGCAGTGATGGCCGCTCTTGGCGTTCAGGGTTCCGCCTCAA
CAACCGCTCCAGGCGGCTGGAAAAAATTCCTCAACTTTTCCCGGTCAAGGACCTTCAACCCAAAGATCGGGGAA
TGA
```

### Eclosion hormone-like

```
>Ac_eclosion-hormone-like [organism= Atta cephalotes] putative precursor
protein (partial)
IGVCIRNCAQCRKMFVYFMGQKCADFCMKYKGLIPDCEDEYSIRPFLQVAEYDY*
>Ac_eclosion-hormone-like [organism= Atta cephalotes] (partial)
ATAGGTGTTTTGCATACGAAACTGCGCGCAATGCAGAAAAATGTTTCGGCGTGTATTTTCATGGGTTCAGAAAGTGC
GACTTCTGCATGAAGTATAAGGGAAAGCTCATTCCAGATTGCGAGGACGAGTACTCCATTTCGTCCTTTTCTTCAA
GTAGCAGAGTATGATTATTAA
```

### Neuroparsin-like

```
>Ac_neuroparsin-like [organism= Atta cephalotes] putative precursor protein
(partial)
GPGHICGGPSSDSWGVCGDGLICSCNRCTGCSVDNLTFCF
>Ac_neuroparsin-like [organism= Atta cephalotes] (partial)
GGCCCCGGACATATTTGTGGTGGTCCAAGCGATTCTTGGGGAGTGTGCGGCGACGGATTGATCTGCAGTTGCAAT
CGCTGCACTGGTTGCAGCGTGGACAACCTTACGTGTTTT
```

### Allatostatin

```
>Cf_allatostatin [organism= Camponotus floridanus] putative precursor
protein (complete)
MKTSSLIAMRLIIFYLLSVVGRSTAAVEEAPASSLHIPRLNPLSSNLEYDEPSEKRAYAYISEYKRLPLYNFGIG
KRWIDNSEDKRTRPFSFGIGKRLRDYRFGIGKRNNGYRPLGMDFSVDNMDFHSREDNLDDFIDDKRGGQPFSGFI
GKRGWKLPMEGEMAVSGRRLNDVVGPYLLGLGKGLSEENENLIQ*
>Cf_allatostatin [organism= Camponotus floridanus]
ATGAAAACCTTCGAGTCTAATCGCTATGAGACTCATTATCTTCTACCTGTTGAGCGTCGTTGGACGATCAACACGG
GCGGTAGAGGAGGCACCGCCTCGTCCTTGCATATTCCACGATTGAATCCGTTATCGAGCAACTTGGAGTACGAT
GAGCCCTCTGAAAAAGGGCGTACGCTTACATTTCCGAATACAAGAGGCTACCTCTTTACAACCTTCGGCATCGGA
AAGCGATGGATCGACAATAGCGAGGATAAAGTGAGTTCCGGATGAAAAATAAATGTTCAATTTCTCGGCGCGAAT
AATTGCTTCGTTATAAGATTGGAAGATCTGGAATTAGAGAGAAATTAATATCAGATCAAATATATTTTCAAGAA
ATATCTTTGCTAAATTTCTTTTTTATTTAAATTGATAAATAATACGGTTCTATTTAACAACATGATAATTAAGAA
ACGAGTAGTAAGAGCCTAAAAACCGGATGGCAATGCGTAAATTTTTTTCGAACATTAATGTTTCGTGAAAAAAT
TTTTAAGACATATACATATATGCCAATATAGTTATAGATTCTTTTTTTATTCTTTTTTTATTGCTTTATTAAGTTAT
TTAAATTTCCCAATGTGCAATAGTGCATAAGAATAAATGTGTGATGCGACGAATAGAAATGAAATTAATTTGT
CATAATCATACTTGTGCGCCCTCATATTTTTCTTTGCATTGAACTTTATTTGCAGCGAACCGCGCCGTTCTCGTT
CGGTATCGGAAAACGTCTTAGGGACTACAGGTTTCGGCATAGGAAAGCGTAATAGCGGATACCGTCCCTTGGGTAT
GGATTTCTCGGTGACAACATGGACTTTTATTCTCGCGAGGATAACCTGGACGACTTTATAGACGACAAGCGCGG
CGGTGAGCCTTTTCAATTTTCGGCATCGGAAAACGAGGCTGGAAGCTGCCAATGGGCGAAATGGCCGTATCCGGAA
GAGACTAAACGACGTTGTGCGCCCGAAATATCTGCTCGGTTTGGGCAAAGGACTAAGCGGAAACGAAAAATCTGAT
TCAATAA
//
Gene 1
Gene 17753 18806
  Exon 17753 18007 phase 0
  Exon 18483 18806 phase 0
//
FT          CDS      join(17753..18007,18483..18806)
FT          /note="Match to ALLS_APIME_Allatostatins"
//
>CamFlo_contig5982.[17753:18806].sp.tr
MKTSSLIAMRLIIFYLLSVVGRSTAAVEEAPASSLHIPRLNPLSSNLEYDEPSEKRAYAY
ISEYKRLPLYNFGIGKRWIDNSEDKRTRPFSFGIGKRLRDYRFGIGKRNNGYRPLGMDFS
VDNMDFHSREDNLDDFIDDKRGGQPFSGIGKRWKLPMEGEMAVSGRRLNDVVGPYLLG
LGKGLSEENENLIQ
//
```

```
>CamFlo_contig5982.[17753:18806].sp
ATGAAAACCTCGAGTCTAATCGCTATGAGACTCATTATCTTCTACCTGTTGAGCGTCGTT
GGACGATCAACAGCGGGCGGTAGAGGAGGCACCGGCCTCGTCTTGCATATTCCACGATTG
AATCCGTTATCGAGCAACTTGGAGTACGATGAGCCCTCGAAAAAAGGGCGTACGCTTAC
ATTTCCGAATACAAGAGGCTACCTCTTTACAACCTTCGGCATCGGAAAAGCGATGGATCGAC
AATAGCGAGGATAAACGAACCGCGCCGTTCTCGTTCGGTATCGGAAAACGTCTTAGGGAC
TACAGGTTCCGGCATAGGAAAGCGTAATAGCGGATACCGTCCCTTGGGTATGGATTTCTCG
GTCGACAACATGGACTTTTCACTTTCGCGAGGATAACCTGGACGACTTTATAGACGACAAG
CGCGCGGTGAGCCTTTCACTTTCGGCATCGGAAAACGAGGCTGGAAGCTGCCAATGGGC
GAAATGGCCGTATCCGGAAGGAGACTAAACGACGTTGTGCGGCCGAAATATCTGCTCGGT
TTGGGCAAAGGACTAAGCGAGAACGAAAATCTGATTCAA
//
```

```
>Hs_allatostatin [organism= Harpegnathos saltator] putative precursor
protein (complete)
MRPTSTSLTAMRLIMLCLLSVVGESTAAMEDMPSSSLHMPRLNPLLNHVEYEEPESEKRSYAYVSEYKRLPLYNFG
IGKRWVDDNEDKRRPFSFGIGKRLRDYRFGIGKRNHPLNLDYLPADNLEAYHSREDNADDLMEEKRSNQPFPSF
GIGKRGWKLKAGATARRPNADVVAAPRYLLSLGKIGEDEEMAQ*
```

```
>Hs_allatostatin [organism= Harpegnathos saltator]
ATGAGACCAACATCAACGAGTCTGACTGCCATGAGGCTCATCATGCTCTGTCTGTTGAGCGTGGTTGGTGAATCG
ACGGCGCGCATGGAGGATATGCCGTCTTCATCTCTGCATATGCCGCGATTAAATCCATTGTTGAACCATGTTGAG
TACGAGGAGCCTTCTGAGAAGAGGTTCGTACGCTTACGTTTCCGAGTACAAGAGGCTACCACTGTACAACCTTCGGC
ATCGGAAAAGCGATGGGTGCGACGACAACGAGGATAAAGTGAGTTGCGGGCGGATAAAGCCGTCTCACCTTCTTCA
TTAAGAAATCTCTTTGCTTTGCTGGTGGCAAACGTCTCGCTCTCGAATGTGTGCGAAAAGAATATTAATAAAAAAT
GATGCCCGATAGAATAGCATGATGCAAAAACAATGTATAAATTTGTGTATTATTGTTTGAAGACTGAACCAAAAAG
ATGAACGTTTAATTGAATCAAATTAATCAAATCAAAAAGTCTAACTAAATCGAACTAAATTAAGGATTCCGGT
CGATCGGCAAAGTGATAATATTGAAATGTATATAATTTCTTTCTCCCCCTTTTTCTATACATTAAGTTGTCCCAT
TTTAAATGAGCCAGGCAAAAATGTGCAAAAATATGAAAGATAATACGAAAGGTTTCAGACAAAAGTTGTATGGTT
TCAAAGGGGATATAAAAACAACATATCATTTTTGTTTACAGATGCCGTTACTTTTTAAAATTTCCAAAAGTCTATAAG
TTAATAAAAAGTTAAGGCATTATTGTAACAATATATTCTGGAGACTAAAATAAAGTAAAAGAGTCAAGTACTATTTT
TTTTTCGACAAAAGAATTAGCGGAGATATCGTAAATTAATGTTGAAAAAGTTACCAAGTTTTTCGCAAAATATCTAAA
AAAATATTAGGAAAATAAAAAAATATTTTCAGACAAAATTTGTTCAAATTAATTGGTAGAAAATAATGATATAATA
AAATGATATGATATAATAAAAAATTGGAGTTTCCATTTAAGTAATGAAATCTGAAACATTTTTTCGGTTTAACGCAG
TGTTTTCTGAGATATTTGAGTGGATCCTTTAAAATGCCTGGTCTTTAAAATATATCGCTGAAATTCGCGCCAGG
CGACGCAAGTCACTAAATCGAGCGAATTCCTTTCGCGAGCAGCAGTTATTATGCGCGATCGAAACGTACCTCAA
TTTTCCGGGTAAGTGAAGTAATTTCTGTCCATTCGGAATTCAGGAATTTGAAAATCAATCTCAATCTCGGACT
GACACGAAAGTTTGAAGAACATTTGCCAGTTTCGAGATATTTCACTGATCATTACTTTTTTAAATGGAACCTCC
AATTTTTTTTATTATATCATCCTTTTTTATGAATCAATTTGAACAACTTTTGTTTGGAGATATTTTTTTATTTGCTT
AGTATTTTTTTTAGATATTTAATGAAAATTTGATAACTTTTTTAAACATTTCAATTTACGATATCTCGCTAATTTATTT
GTCGAAAGAAGAAATAGTATTAGAATTTTTTACTCTAGTTAGTCTTGAGAATATGCTATTAGAATAGTGCCCTAA
CTTTTGTAACTTATCAACCTTTGGAAAATTTCAAATCATCAAATTAACAAAAGTTCGTAGAGAGAGGAAAAATAT
CGTAGAGGAAGAACGATATTTCCCGAGAGCATTTTAAAGCCAGAAACCGCAGCTTTCATATATTGTCAAGCTCAGT
GTCGCATTTGCTCCAGGCGGCACCTTCTTCCAAGTCATCTATGAGAAATTCGCGGGTAAATGTCGACTTTGAGGTC
ACACGTACACAAAGGATGAATCATTTTTGTTTTATTCTGTTTAAAGACAACCTTGAGAACTTAAAGTCTATTTATTTT
GCCAAAATATCCGTTTTGAAATTAACACTACTATTTTTTCCGCCAAAACCTTTTGTCTGAAACATTTTTCCATATTT
AAAGCCGTTTTCCGAGATCCAGTGGTGGAGTCGGACTTTACAGATATCCTGTATAGAGCGATCCACATAAAGTGTA
ATAACCCAAAACACTAAAATATTTGTGCTATTAAAAAGTTATTCATGAGAAAATTTTCATATATATCGTCTTTCTA
TATAAATAAAATTTGCCCCCTCCTTCTTCTTGAAGGAAAAGTGGGAAAATAACTTTCGTAATTTTTAAATACCCTTCC
TATAAATGTTACATATTCGGATTGTGTGAGAAAAAAGAAATAAACTTTATCTGGAACATTTCTTTAAAAAATTCG
TTCTATATAAAATTTATAAACATTAAGTTTTTAAATAGAATGTATTCAACTAATGTGATAAAAATCATAAATTCAA
TAAAAGGTTACATAGTTCTTCTGACTACATAGTTTTTAGCTTTTAAATAGTTAATAAGTTTTAACATAGCTTTTTT
TACTTTATTACATGTTTAAACTATTAATCATCCACATTTTCAAATACTTATTAATTTCTTCTACAAAATTTTGT
CTAACTCTTTTCAAACCTTTTCTAAAGTTTCATTTGAAATACGAAATTCCTCCCCCTTCCCCTCTCTTCAAG
GCTGAATTTTTTATATATAGTTAGAAAGACTTTCATGTGAATACATGAAACTTTTTTATGAAACACTTTTTTGCA
CGATAAATATTTTTAGAGTTTTTTAGGATTGTACACTTTACGTGTAGGCCACCCTGTATAATAATTTTTTCTCCG
GATATTCGGTGCACCAATTACAAATAAACTCGCATACCGTCTTCTCGCGAGTTTTGTTGAATAACACACAATTA
TTAGCATTAATAACATACATAATTAATTAACATTTGAAATAATACATGCTGAATTAATAAATTCAAAGAAACACACC
GCGTCGGAAGCGAAGTATTCTCCTATATAGCACAAAAGTTGCAGCAATATTGTTGCAACGTTGCAGCGATGTTGC
TGCAACTTCTCTACTGTATAGGTTAGGTATAGACTGATATGTTGCAAGTCAACGTGTAGCCAATGTATCGTACAAT
AGTCCTGGAACACTCTGTATATCCTAATTTGTGTATGTGTGTGTGTGTGTGTGTGTGTGTGTGTGTGTGTGTGTG
GCACGCGTGATACGATGTATCATGCAATGAGAATTATCCGCACACGTACAGTCGCATAATGCAATTAAGAACCT
TCACACGTCCTAATAATTTCAATTCGAGAGAACACGGCCCTTCTCTTTCCGGCATCGGCAAGCGTCTGCGAGACT
ACAGGTTCCGGCATAGGCAAGCGCAACAGCCACCCCTCAACCTGGATTACCTTCCGGCCGACAACCTCGAGGCTT
```



```
ATCACTCTCGCGAGGACAACGCGGACGATCTCATGGAGGAGAAGCGCAGTAACCAGCCGTTTCAGCTTCGGCATCG
GGAAACGCGGCTGGAAGTTGGCCGGAGCGACAGCGAGGAGACCCAACGCCGACGTCGTCGCTGCTCCGCGTTATT
TACTGAGCTTGGGCAAAGGCATAGGCGAAGACGAGGAGATGGCTCAGTAG
//
Gene 1
Gene 83921 87417
  Exon 83921 84181 phase 0
  Exon 87100 87417 phase 0
//
FT          CDS      join(83921..84181,87100..87417)
FT          /note="Match to ALLS_APIME_Allatostatins"
//
>HarSal_contig8088.[83921:87417].sp.tr
TSLTAMRLIMLCLLSVVGESTAMEDMPSSSLHMPRLNPLLNHVEYEEPESEKRSYAYVSE
YKRLPLYNFGIGKRWVDNEDKTRPFSFGIGKRLRDYRFGIGKRNSHPLNLDYLPADNL
EAYHSREDNADDLMEEKRSNQPFSGIGKRGWKLATARRPNADVVAAPRYLLSLGKGI
GEDEE
//
>HarSal_contig8088.[83921:87417].sp
ATGAGACCAACATCAACGAGTCTGACTGCCATGAGGCTCATCATGCTCTGTCTGTTGAGC
GTGGTTGGTGAATCGACGGCGGGATGGAGGATATGCCGCTTCTCATCTCTGCATATGCCG
CGATTAATCCATTGTTGAACCATGTTGAGTACGAGGAGCCTTCTGAGAAGAGGTCGTAC
GCTTACGTTTCCGAGTACAAGAGGCTACCACTGTACAACCTCGGCATCGGAAAGCGATGG
GTCGACGACAACGAGGATAAAAGAACACGGCCCTTCTCTTTCGGCATCGGCAAGCGTCTG
CGAGACTACAGGTTTCGGCATAGGCAAGCGCAACAGCCACCCCTCAACCTGGATTACCTT
CCGGCCGACAACCTCGAGGCTTATCACTCTCGCGAGGACAACGCGGACGATCTCATGGAG
GAGAAGCGCAGTAACCAGCCGTTTCAGCTTCGGCATCGGAAACGCGGCTGGAAGTTGGCC
GGAGCGACAGCGAGGAGACCCAACGCCGACGTCGTCGCTGCTCCGCGTTATTTACTGAGC
TTGGGCAAAGGCATAGGCGAAGACGAGGAGATGGCTCAG
//
```

```
>Ac_allatostatin [organism= Atta cephalotes] putative precursor protein
(complete)
MKTATSLITIRIIMFYLLSVVGRSAVAIEEASSSSLHIQRLHPLLNMEYNEEPMKKAYIAEYKRLPLYTFGIGK
RWIDNNEKDRTRQFSFGIGKRLRNYDFGIGKRNNEYHPLDYFLVDNMGNYQSHEDNSNDFIENKRGNHQFGFGIG
KRVWKLATGETAVSGRRLNDAIVPKYWFSTLTKELDENEDLNQ*
>Ac_allatostatin [organism= Atta cephalotes]
ATGAAGACAGCAACAAGTTTAAATTACTATAACGAATTATTATGTTTCTATCTGTTGAGCGTTGTTGGACGATCAGCA
GTGGCAATAGAAGAAGCATCTTCTCATCTTTACACATTCAACGATTGCATCCGTTATTAAACAACATGGAATAT
AATGAAGAACCTATGAAAAAGGCATACATTGCCGAATATAAGAGATTACCCCTTTTATACTTTTCGGTATTGGAAAA
CGATGGATTGACAATAATGAAGATAAAGTGAGTTTTAAATGAAATGAAATATCCTCTTTTAAATGTTTAAAAATGA
ATGAATTTTTCTGTTACAAAAAAATTTAATTACAGAAATGTCATAAATCCAGCAAATATCCGAATAAATAGTGCA
ATTACAAAAATTGCGTAATAAAATTTTTGTAATTAACAAACATGAACTTTTTATTATGTTACTTGTACTTATACGAT
ACAATACTATTTAAAAGTATTATAAGATTGTAACATATAAAAATTCGATTATATTTAATTAAGGTCAAAATTAATG
TTTCTTCAATGTAATGTTTTACGTTTTCAATTTTAAATATATTGATTCCGACTTTAATAACATAAACTTTAACA
TATCAATGTTTTATTATACAAGTTATAATAATTAATTAACATACAGAAAAATAAAAAACATCCACTAATTAATTTA
AATAAGAAATTAATAATGGATATTTTTATTGTTCTGATAATATTTCTGATAATTGTATCTTTATGTGTTGAAAT
TATATCTTTTATACATAGCGAACCCGGCAATTCTCGTTCCGGTATTGGCAAGCGTCTCCGAAATTACGATTTCCGGTA
TAGGAAAGCGCAACAATGAATATCATCTTTGGACTATTTCTTGGTTCGATAACATGGGGAACTATCAATCTCACG
AGGACAACCTCAAATGATTTTATAGAAAACAAACGTGGTAACCATCAATTCGGCTTTGGAATTGGAAAACGAGTTT
GGAAATTGGCGACTGGAGAAAACGGCTGTATCCGGAAGAAGATTAAACGATGCTATAGTCCGAAATACTGGTTCA
GTACTTTGACCAAAGAAGTAGATGAGAATGAGGATTTGAATCAGTAA
```

### Inotocin

```
>Hs_inotocin (vasopressin/vasotocin-like) [organism= Harpegnathos saltator]
putative prepro-protein (complete)
MLRELVVFASLIFLSYACLITNCPRGGKRGDIIPSLGTVTRECPCGPNHLGQCFCGPHICCGPTIGCFIGTPEY
RCRKESPYARPCIAGYAMCRGNTARCATNGICCSQDSCHMDTSCRISDVVSNDRKMDADLSAILSSNEASHEIIQ
*
>Hs_inotocin (vasopressin/vasotocin-like) [organism= Harpegnathos saltator]
ATGCTAAGGGAACCTCGTCGTTTTTGCAGTCTCATTTTCTTAAGTTATGCTTGTTTAATTACGAATTGTCTCTCGC
GGTGGAAAAAGAGGTGACATTATACCTTCTTTGGGAACTGTCACCTCGAGAAGTGAGTAATGTTCCAAATCATATA
ACATATCTTTTCTATAATAAAAAATTTGTCATTTATCTATTTTTTCCCGCATTGAAAAGAGTGTAGAATATTG
ACAAAATTCGTATTATTAGAAAAGTATTATCAGAGCAAAAATTTCTGATCATTTTGTAAATCAATCATTTGTTT
ATCTAACCAATATCTTCGTGAATTTGATTGATATATATTGTAATGTGCGATATGACTTTCTGATATAATCTAAT
CCTTATAATATTCTCTGAACTCAGTGCCCTCCATGTGGTCCCAATCATCTGGGTCAATGCTTTGGGCCCTCACATT
```

```

TGCTGCGGCCCTACCATTGGATGCTTCATTGGAACACCAGAAACATACAGATGCAGAAAGGAAAGTCCATATGCT
AGACCTTGCATCGCAGGCTATGCAATGTGCCGTGGAAACACAGCTAGATGTGCTACAAATGGAATTTGTTGCTCA
CAAGGTAAATATAAACACTATATAACATTGAAACATTTAAAAATAAACTTTGGAACAATCTCTCTCCAGAGATTTA
ATCTAATCAAATTTTTATGACTAATTTTTATGACTAATGAGGGAAATCCTATTAGCTAAATATATATGATATAACA
ACAGAATGTTAAACAGTATAGTAAAATTTATTATATAATAGAAACGCCCTCGAATGTAATGGTAATCAATTGCA
TAATGGTAAAAATAATTTGCAATTAGAAGTAAACCGTTTTGGAGATTACATTGTTGATGCCATCATGAAATATGA
GGAAGTTATGTTACAATAAAGATGTATTATTTTGTCTAGACTCTTGCCACATGGATACATCGTGCAGAAATTTCT
GATGTCGTTAGCAATGATCGCAAATGGATGCTGATCTGAGTGCGATATTGTGCGAGTAACGAAGCCTCCCATGAG
ATAATTC AATAA

```

```

//
Gene 1
Gene 31248 32174
  Exon 31248 31322 phase 0
  Exon 31596 31800 phase 0
  Exon 32137 32174 phase 1
//
FT          CDS      join(31248..31322,31596..31800,32137..32174)
FT          /note="Match to A3RE83_TRICA_Arginine-vasopressin-like-peptide"
//
>HarSal_1385.[31248:32174].sp.tr
CLITNCPRGGKRGDIIPSLGTVTRECPCPNHLGQCFGPHICCGPTIGFIGTPEYRC
RKESPYARPCIAGYAMCRGNTARCATNGICCSQDSCHMDTSCRISD
//
>HarSal_1385.[31248:32174].sp
TGTTTAATTACGAATTGCTCTCGCGGTGAAAAAGAGGTGACATTATACCTTCTTTGGGA
ACTGTCACTCGAGAATGCCCTCCATGTGGTCCCAATCATCTGGGTCAATGCTTTGGGCCT
CACATTTGCTGCGGCCCTACCATTGGATGCTTCATTGGAACACCAGAAACATACAGATGC
AGAAAGGAAAGTCCATATGCTAGACCTTGCATCGCAGGCTATGCAATGTGCCGTGGAAC
ACAGCTAGATGTGCTACAATGGAATTTGTTGCTCACAAGACTCTTGCCACATGGATACA
TCGTGCAGAAATTTCTGAT
//

```

```

>Cf_inotocin (vasopressin/vasotocin-like) [organism= Camponotus floridanus]
putative precursor protein (partial)
MLKQLVICASLIFLSHACLIVNCPRGGKRSDIASFLKTVTRE
>Cf_inotocin (vasopressin/vasotocin-like) [organism= Camponotus floridanus]
(partial)
ATGCTAAAGCAACTTGTCAATTTGTGCGAGTTTGTATTTTCTTGAGTCATGCTTGTTTAATAGTGAATTGTCCACGT
GGTGGAAAAAGGAGTGATATCGCGTCTTTTTTTGAAAACCTGTTACACGAGAAG

```

```

>Ac_inotocin (vasopressin/vasotocin-like) [organism= Atta cephalotes]
putative prepro-protein (partial)
MLKELIVFASLIFLSYACLITNCPRGGKRSVDVASSLRTVIRECPSCGNHLGQCFGPYICCGPSIGCFIGTPETF
RCRKESLYTRPCIAGYAMCRGNTARCASNGICCSQ
>Ac_inotocin (vasopressin/vasotocin-like) [organism= Atta cephalotes]
(partial)
ATGTTAAAGGAACTCATTGTTTTTGGCAGTTTTGATTTTTCTGAGTTATGCTTGTGTTGATTACGAATTGTCCTCGT
GGCGGAAAGAGAAGTGATGTAGCATCTTCTTTGAGAAGTGTATTTGAGAAGTATGTTATATTACATTATATTTTT
TATCTTTACAGTAAAATTCCTTTGATTTTTAATCATCTTGCAAGTAAATTTTATTTTATAAAGACTTTAGCAAAT
CTTATATTTACTCAATTAACATGTCATTAATAAATAAATAATTAGAATTTATTTATCTTATATATCTCTTCTAT
TATTTATGTTGCTCTTTTTCTATTTATAATGATTTAATAGTTACATTAATTCAAGAATTGTAATTTATTTTATTT
GCACTGATAAAAATTTGACGATTTGTATTAAGAAAATTTAGAAGATGATCAATAGAGAATTTATACTTATAGAA
ACAATTATAGAAACAAATTTATTAATCTTAGAAACAAATGTCTGCGTTCCGTTATTTACTGCGAGTATTTGAAAA
TCTAATTCACGTATAGTTGTATAGATTTTTCAGTATTCACATGAAATTCGAATGAATAACGGAACGGAGCTGTAGC
ATAATTTGAACAAAATTTGAGAAGAACAAAAATTTGAGGTTAATTTAATTTAATTGATTGACAAAAATTTGTTTATA
TTATTTAATAAATTAATTTGATAAATTAGAAGATGTTTATCTATGGAATATATGAAACAAAAAATTTACAAAAAAT
TTTCTTTTATAATAATGAAATAAATATATCTTGATGTTTAAATCTTAAATTTTTTCTATTTATTTCTAGTAAAA
TATTCACATAAATATTATTAATGATAAGTCATAAGTCATAAGTAATTTATAAGTCATAAGTAAATACACAAAAAT
GTAATTCGTTTCATATTTACCATAACATTTCTCCTAGTGTCTTTCATGTGGTCCATAATCATCTGGGTCAATGCTTTG
GGCCTTATATTTGTTGTGGCCCTAGTATCGGTTGCTTCATAGGAACACCAGAAACATTTTCGATGCAGAAAAGGAAA
GTTTATACACCAGACCCTGCATTGCTGGATACGCAATGTGTGCTGGAAATACAGCAAGATGCGCTTCAAACGGAA
TTTTGTTGCTCGCAA

```

### Ion transport peptide-like

```
>Cf_ion-transport-peptide-like [organism= Camponotus floridanus] putative precursor protein (partial)
FTWSLTFLLISSCIGLGADAAAMNAHSLGKRSFFDIQCKGVYDKSIFARLDRICEDCYNLFREPQLHMLCKYV*
>Cf_ion-transport-peptide-like [organism= Camponotus floridanus] (partial)
TTCACGTGGTCCCTGACGTTTCTGCTGATCTCATCTTGCATCGGTCTGGGCGCGGATGCCCGGCTATGAACGCC
CATTTCGCTGGGTAAGAGGTCTTCTTCGACATCCAGTGCAAGGGCGTGTATGACAAAAGCATCTTCGCCCGTCTG
GACCGCATCTGCGAGGATTGCTACAACCTGTTCCGGGAACCAACTGCATATGCTTTGCAAGTACGTCTGA
```

```
>Ac_ion-transport-peptide-like [organism= Atta cephalotes] putative precursor protein (partial)
MSVLTWLTLTLLLISSCIGLGADAASLSGHPLGKRSFFDIQCKGVYDKSIFARLDRICEDCYNLFREPQLHMLCKQ
DCFSTQYFTSCIQALLLEDEKERLQEMVEYLGRKK*
>Ac_ion-transport-peptide-like [organism= Atta cephalotes] (partial)
ATGTCCGTCCTCACGTGGTTCGCTGACGTTACTATTGATCTCGTCTGCATCGGCCTAGGCGCGGATGCCGCCAGC
CTTAGCGGCCATCCTCTGGGCAAAAGGTCTGTTCTTCGACATCCAGTGCAAGGGCGTGTACGACAAGAGCATTTTC
GCCCCGTCTGGACCGCATCTGCGAAGACTGCTACAACCTCTTCCGGGAACCGCAATTGCATATGCTTTGCAAGCAA
GACTGCTTCAGCACACAATACTTACGAGCTGCATCCAAGCGCTGCTGCTTGAGGACGAGAAGGAAAGGTTGCGAG
GATGGTTCGAGTACCTAGGTGCGAAGAAGTAA
```

```
>Hs_ion-transport-peptide [organism= Harpegnathos saltator] putative precursor protein (complete)
MYPsAAYHSSHSTLPSSTLSASSSSSPASPSSLPLPSRPLSASSSPILLSVLWTLALLLISSCINLTDARTLN
GHPLSKRSFFDIQCKGVYDKSIFARLDRICEDCYNLFREPQLHMLCKKNCFTTDDYFKGCLDVLVLLSDEVEKIQMW
IKQLHGADPGV*
```

```
>Hs_ion-transport-peptide [organism= Harpegnathos saltator]
ATGTACCCGTCGGCCGCTACCACTCCTCGCACTCGACGCTACCGTCGTCGACGTCGCTGTGCGCGTCTGCTCCTCG
TCGTACCCGGCGTCGCGCTCGTCTTGGCGTTGGCGTCGAGACCCGCTCTCGGCGTCTCGTCTCCGATCCTGCTG
TCTGTCTCACGTGGTTCGCTTGCAGTCTGCTGATCTCGTCTGCATCAATCTGACGGACGCGCGCACCCCTCAAC
GGCCATCCCCTGAGCAAAAGGTCTTCTTCGATATCCAATGCAAGGGCGTGTACGACAAGAGCATCTTCGCCCGC
CTGGACCGCATCTGCGAAGACTGCTACAACCTCTTCCGGGAGCCGAGTTGCACATGCTTTGCAAGTAATTGTCA
AGCGATCAAGTCAGTCTCCTCCGGGTATCAAATGCGAAAGCCGGTGTGCGCGCGGAGAGAAAGTCGCTCGCCTC
CGCGGAGAGGAGAGAGAGAGAGAGAGAGAGAGAGAGAGAGAGAGAGAGAGAGAGAGAGAGAGAGAGAGAGAGAG
CGTCCCCTAATTTGCGGTTTTCCGATCGAGGATCGAGCGCGCCTCTGCTCGGATAAATCTCCCTTCCCGGACAA
CAACGTCGACGATGACGCAACCCGACGCGGGCGTCATCATCGGCGGGGTTAACTTGATATTTTTAACGATGCTCAT
CCTCGAGCGAGCAAAACCGGCCACGCGGGCGAGAACGGTCTTTCCCGGAAAGACCCGCTAAAAATCGGCCGTTT
AAACGTTCCGCGCTGTGAGGGTCAAGGTGGCGCCAGCGATCGGCAACCTTCGACGTGGACTTGTCCGCTTAGCGT
GTCTATCTTTTCAATTCGCTGTGAAACCCGAGCGGGAATTATCGAGCGCCTCGTCTTCTCGGCCGAGACCAAGAGA
AAAGGAATCGAGTTTACGGGATACGCGTGCAGGAGAGCGCCTCGCCAGCCGGGAAACCCGCGGAGGCGAAGGCGACA
GCGCGCGGAGAGGAAAGTCGCGGGCGACTTCCGCCGCGTATTTCTACATTCAAAAATGCCGGCGGCGGCGGCTG
ACTCGGCGAACAACGGCCAAGGTGGACAGATACGTACCTTTGTAGGCGCGCGCACACGTGCTCCGGTCTCGGTGC
CACCGTGTACACCGTGCGAATACCCCGAGTCCGCCGCGCGTCCGACGTTGATCGAAATGGAATGAGATTTCTCT
TCTATTTATAGCTCGCGCGAGCGAATGCCAACGCACATCCGCCGCTACCTGCCGTTTGTGCCGCGCCGCGCTCGG
CCGCTTAAACGGCGTCTCGAAAGAGCTATTGTACCGGCAAACGGGTTCAACGCGAGCAGGGGAAGGGGGATTGAC
GTCCAGCTCGAGAAAGAGAGAGAGAGAGAGAGAGAGAGAGAGAGAGAGAGAGAGAGAGAGAGAGAGAGAGAGAGAG
TTTTCGTGTGAAAATTTCGCGACGGGATGGCGGCTGAGTCGATAGTCGAGAGCGGAGCGTTTCAAATTTGTTCAC
ACGTTTCTCGCTGAACGCAGATGTCAGCAGCATTGTACATTCGTTGTTAATCACTGTACATTCGCTTACTTGG
TTTTCTGAGTAATTTTCCCGTCCGATCTCTCTCGAGTGTGCGCTTGGCGCAGAGGCCAGCTGGTGTCTCTCTCGA
GTCGATGAGAGAGCGCGTCCGGATATTTCAAATGACGGCGGCGTTAATCGGTTAGGTTTTGTCTACTTCCGA
AAAGGAAAGGATATGATCGCGTTGCTTTCCGGTGTACCGGAAAGTGAATGAAACGAGGGTCTCTCTCTCTCT
CTCTCTCTCTCTCTCTCTCTCTCTCTCTCTCTCTCTCTCTCTCTCTCTCTCTCTCTCTCTCTCTCTCTCTCTCT
AGAAGGAATTCCTCGAATCTCACGGTCGCAATCTAATCACAATACGATACGATTGTAAGGAGTAGATTTGTGCGG
TGAGAGAGGGAGAGAGAGAGAGAGAGAGAGAGAGAGAGAGAGAGAGAGAGAGAGAGAGAGAGAGAGAGAGAGAG
CCAGGCCACCGCGGAGCGAATGGCGTTGACTCACGATTCACCGTGTGCTTGTGTTTCAAATGTTTGCAG
GAAGAATGTTTTACGACGGACTACTTTAAAGGATGCTTAGACGTGCTGCTGCTGCTGCTGCTGCTGCTGCTGCTG
CCAAATGTGGATCAAACAACCTCCACGGAGCTGACCCTGGGGTTTAG
```

```
//
Gene 1
```

```
Gene 1 2218
  Exon 1 365 phase 0
  Exon 2101 2218 phase 2
//
>HarSal_8001.[1:2218].sp.tr
MYPsAAYHSSHSSTLPSSTLSASSSSSPASPSSLPLPSRPLSASSSPILLSVLTWLSLALL
LISSCINLTDARTLNHPLSKRSFFDIQCKGVYDKSIFARLDRICEDCYNLFREPQLHML
CKKNCFDDYFKGCLDVLVLLSDEVEKIQMWIKQLHGADPGV
//
>HarSal_8001.[1:2218].sp
ATGTACCCGTCGGCCGCTACCACTCCTCGCACTCGACGCTACCGTCGTCGACGTCGCTG
TCGGCGTCGTCCTCGTCGTCACCGGCGTCGCGTCGTCCTTGCCGTTGCCGTCGAGACCG
CTCTCGGCGTCGTCGTCCTCCGATCCTGCTGTCTGTCTCCTCACGTGGTCGCTGCACTGCTG
CTGATCTCGTCCTGCATCAATCTGACGGACGCGCCACCCTCAACGGCCATCCCCTGAGC
AAAAGGTCCTTCTTCGATATCCAATGCAAGGGCGGTGACGACAAGAGCATCTTCGCCCCG
CTGGACCGCATCTGCGAAGACTGCTACAACCTTTCGGGAGCCGCGAGTTGCACATGCTT
TGCAAGAAGAATTGTTTACGACGGACTACTTTAAAGGATGCTTAGACGTGCTGCTGCTG
TCGGACGAGGTGAGAAAATCCAATGTGGATCAAACAACCTCCACGGAGCTGACCCCTGGG
GTTTAG
//
```

### CHH-like

>Cf\_CHH-like [organism= *Camponotus floridanus*] putative precursor protein (partial)

RQECFSTEYFTSCMQVLLLEDEKETLQEMARYLGRKK\*

>Cf\_CHH-like [organism= *Camponotus floridanus*] (partial)

AGGCAAGAGTGCTTCAGCACAGAATATTTACGAGCTGCATGCAAGTGCTGCTTGAAGATGAGAAGGAAACG  
CTCCAGGAGATGGCCAGGTACCTAGGTGCGCAAGAAGTAA

### Tachykinin-related peptide

>Ac\_tachykinin-related-peptide [organism= *Atta cephalotes*] putative precursor protein (complete)

MLFSSVFLAVWTSFSAEESNDAAASAKRAPMGFQGMRGKKDLIPTVAEHNELSKRTLNVNFQGMRGKKDYLI  
PDESYFLEDYDKRAPMGFQGMRGKKAILEDEYYKRAPMGFQGMRGKKSLEEVLSIEIKRAASLGFYTRGKKTYI  
FEYFQDYEKRLLLAMEFQDMHNKIKEEWEKRASMGFQGMRGKKALYDEIEELEKRTLTMGFQGMRGKKDGFENYIDY  
YIDDPDMDFDKRASMSFQGMRGKDDTKRAPMGFQGMRGKRSVGRFEPSTNFGPLNEYQGMGNRRHILASCQVE  
KRSPFRYFEMRGKKNPRWELRGMFVGRGKKNWANAPYEDNSPFIRVLDNTERIGMDGDSPTTLGNRLADSQVLVSN  
ILVAIFIASFIFYAYLNMLVVFICYQAVYQNVKEKLNLSLSTQTFKNLLERILNAMYHFQKFLNITLIFYVFT  
LHATHRAYLNVFSIFVICVDILYSYCNCFYSRY\*

>Ac\_tachykinin-related-peptide [organism= *Atta cephalotes*]

ATGCTTTTTAGTTTCGGTTCTTTTCTGGCAGTCTGGACTAGTTTCGTCATTCGACAGGAATCCTCCAATGATGCC  
GCGTCTGCCAAACGAGCGCCCATGGGATTTCAAGGTATGCGCGGAAAAAAGACCTCATTCCTACGGTTCGACAGAA  
CACAATGAACCTTTCCAAAAGAACATTAGTGAATTTTCAGGTAAGCTATTATCTAACTTTTTTTATAAAAATGACA  
TAGGAGAAGAAGAAGGAAAGTCTAATTTTATATGTTTAGTTTATTATTTTTTAAATTTATATAAGATAAAGAGA  
TTCCGATAATTACAGGATAAGGTTTTCGAGCGCGTCCGAAATTGAGGACAATCTTCTGCACGATGAGTTTGCCAAA  
AGAGCACCGAAGGGATTTCAGGGTATGAGGGGGAAAAAGGATTATTTGATACCTGATTTTTGAAGACTCCTACTTT  
CTTGAGGACTACGACAAAAGAGCGCAATGGGTTTTTCAGGGTATGAGAGGCAAGAAGGCTATATTAGAAGACGAA  
TATTATAAACGTGCACCTATGGGATTTCAAGGAATGAGAGGGAAGAAATCTTTGAGGAGGTAAGCGTGAACATT  
TAGTGATTAATTGAATTATTATGCTGCAAGAGCTCAGGACGATAATAGATCAACATTAACAACCTTATAAGATTCT  
TAAGTATGAAATTTACAAAATGGATGTCATAAATTATAGAATTATTCTGCTTTTTCTTCTTTAGTTTTCTCT  
ATTCACATGATTAGTTTATCTTTCTTAAATAAACATAAATCATTATAAAAAGATTCTTGGTCATTTAAGCATTTTA  
AATAGCAATTTAATGTATCTTAAATTAACAGATTTTGATTTGCCTGAAATTTAGTCGTCGTTGTTTATATTTTAT  
TTTTATTAATAAATAATTAATAATTACAGGTGCTGAGTGAAATTGAAAAGAGAGCTGCGTCGTTGGGCTTTTTATGGTAC  
TAGAGGAAAAAACAATATATTTTTCGAGTATCCACAAGATTACGAAAAGAGACTTTTTAGCAATGGAATTTCCAAGA  
TATGCACAATAAGATAAAAAGAAGAATGGGAAAAAAGGGCTTCTATGGGATTTTCAGGGGATGAGAGGCAAGAAAGC  
ATTGTATGACGAAATAGAAGAAGCTTGAAGAAAAGAACCTTATGGGTTTTTCAGGTAATTAATTAGTTGCTTAATC  
AGTTCTGGAACATAGATTGTTTTCTATTTAATTGAATATATTTAACTTTCAATATAAATTGATAAGAAATATTTA  
ATTAAGAAAACGTTAAAAGTTAAAAAAGAAATGTTTTTAATAATTATTTAATTAATTAATTAATTTAGGG  
CATGAGAGGCAAGAAAGACGGCTTTGAAAATTACATAGATTATTACATAGATGATCCCACATGGATTTTGACAA  
GAGGGCATCAATGAGTTTTCAAGGGATGAGAGGCAAGAAAGACACCGATAAGAGAGCACCGATGGGTTTTCAAGG  
TATGCGGGCAAGAGGAGTGTAGGACAAAGATTTGAGCCCAGCAGCAATTTTGACCATTAAACGAATATCAAGG  
TAAGGTCATATTGCTTACATTCTATATTTATGATAAATTGAAAAGAGAGAAAACATTTGAATATCATTATAATTA  
CATTTGTTAGTAATATTTTTTTCATAAAAACATTCATAACTCTACAATTATTAATGACTTACAAAATAATTTATT

```

TGTAAGAAAGATTTTATTAATAAGTTATAAAAATAATTGAGTTTATACTTAATTTATTAATTAATTTACTTTCGAAA
CTTATGTGATCTCTAATTTTCATAAATCTTGCTTTAATCATTATAAATATGTAAATATGTTAAAACTTGTATTATCT
TTAATATAAATTTTAATATGAAAAATGGTTCATGCGGAAAAGTTAAAAAATTTCTCTTTTTTATATGAGAAAGTTTGA
GAAGCTGGAGACACGATTACTTGCATATTAATAACGAAATAAAAAATTTTGCATACGGGAGCAGTTTTTATCAG
TGTATGTTTGATTAAATGTGTTATAACTCGATGAAAAATATTTTTCTGTGCTTTTTTATTGCGCACTCTAGAATGTC
TACTCGTACTTTTTGAATGCCCTTGTAAATATTACTCGACGATATAATCGATCGAGTCTAAGTGGAACGTAACGA
AGGCTTCCCAAATATTTGTCTATTATTTCATGCACCTCCAAACAAACTCTGTAGTGAGAAGGTAGACAATTTTTTT
TATTTTCTTTTTTTTTTACCCTTCTTATATATGCCGTGCGATTTTTGAGGTGCGAAATGGTCAATTGGCCACGTTG
TGTTTCCCCCGAGCAGGAATGGGCAATAGAAGACACATTCTAGCCTCGTGCCAAGTCGAAAAACGATCGCCTTTC
CGATATTTTGAGATGCGCGGTAAGAAAAATCCACGATGGGAGTTACGGGGGATGTTTGTGGGGGTGAGAGGCAAA
AAATGGGCGAATGCCCGTACGAGGACAACAGCCCATTCATAAGGGTGCTTGATAACACCGAGAGGATCGGGATG
GATGGGGATTGCGCCGACAACATTAGGTAATCGATTGGCTGACAGTCAATTGGTATCAAAACATTCTTGTGCGCAATT
CTCTTTATCGCTTCGTTTATCTTTTATGCGTATCTAAATATGCTTGTAGTATTTATTAAGTATCAAGCAGTTTAC
CAGAATGTAGAGAAAAGAAAAATTAATTTTATCTCTTCCACACAAAACATTCAAAAATCTTCTTGAGCGTATTTTA
AATGCAATGTATCATTTTCAAAAATTTTTGCTAAATATTACACTCTTTTATGTATTTACTTTGCATGCGACACAT
CGAGCATATTTAAATGTATTTCAGTATATTTGTAATATGTGTGATATACTTTATTCTTACTGTAATAATTTGTTTT
TATTCACGCTATTGA
//
Gene 1
Gene 10749 13226
    Exon 10749 10937 phase 0
    Exon 11145 11333 phase 0
    Exon 11674 11925 phase 0
    Exon 12097 12322 phase 0
    Exon 13090 13226 phase 1
//
FT          CDS      join(10749..10937,11145..11333,11674..11925,12097..12322,
FT          13090..13226)
FT          /note="Match to TACHY_APIME_Tachykinins"
//
>Atta_cephalotes_contig00331.[10749:13226].sp.tr
MLFSSVLFVAVTSSSFAEESNDAAASAKRAPMGFQGMRGKDLIPTVAEHNELSKRTL
VFQGMRGKDYLPIDFEDSYFLEDYDKRAPMGFQGMRGKKAILEDYKRAPMGFQGMRG
KKSLEEVLSIEKRAASLGFYGRGKTYIFEYQDYEKRLLEMEFQDMHNKIKEWEKR
ASMGFQGMRGKALYDEIEELEKRTLGMGFQGMRGKKGDFENYIDYIDDPDMDFDKRSM
SFQGMRGKDDTKRAPMGFQGMRGKRSVGRFEPSTNFGPLNEYQGMGNRRHILASCQVE
KRSPFRYFEMRGKKNPRWELRGMFVGVGRGK
//
>Atta_cephalotes_contig00331.[10749:13226].sp
ATGCTTTTAGTTCGGTCTTTTCTGCGAGTCTGGACTAGTTCGTCATTCGCAGAGGAA
TCCTCCAATGATGCCGCTCTGCCAAACGAGCGCCCATGGGATTTCAAGGTATGCGCGGA
AAAAAGACCTCATTCTACGGTTCGAGAACACAATGAATTTCCAAAAGAACATTAGTG
AATTTTCAGGGTATGAGGGGAAAAAGGATTATTTGATACCTGATTTTGAAGACTCTAC
TTCTTGAGGACTACGACAAAAGAGCGCAATGGGTTTTTCAGGGTATGAGAGGCAAGAAG
GCTATATTAGAAGACGAATATTATAAACGTGCACCTATGGGATTTCAAGGAATGAGAGGG
AAGAAATCTTTGAGGAGGTGCTGAGTGAAATTGAAAAGAGAGCTGCGTCGTTGGGCTTT
TATGGTACTAGAGGAAAAAACAATATATTTTCGAGTATCCACAAGATTACGAAAAGAGA
CTTTTAGCAATGGAATCCAAGATATGCACAATAAGATAAAAAGAAATGGGAAAAAAGG
GCTTCTATGGGATTTTCAGGGGATGAGAGGCAAGAAAGCATTGTATGACGAAATAGAAGAA
CTTGAGAAAAGAACCCTTATGGGTTTTTCAGGGCATGAGAGGCAAGAAAGACGGCTTTGAA
AATTACATAGATTATTACATAGATGATCCCGACATGGATTTTGACAAGAGGGCATCAATG
AGTTTTCAAGGGATGAGAGGCAAGAAAGACACCGATAAGAGAGCACCGATGGGTTTTCAA
GGTATGCGGGGCAAGAGGAGTGTAGGACAAAGATTTGAGCCCAGCAGCAATTTTGACCA
TTAAACGAATATCAAGGAATGGCAATAGAAGACACATCTAGCCTCGTCCAAAGTCGAA
AAACGATCGCCTTCCGATATTTTGAGATGCGCGGTAAGAAAAATCCACGATGGGAGTTA
CGGGGATGTTTGTGGGGTGAGAGGCAAAAAA
//

```
